# Supplementary material
Source: HighWire-hosted journal article supplement (http://www.cmaj.ca/highwire/filestream/116618/field_highwire_adjunct_files/0/211926-image-1-at.pdf)

Histopathological feature. Perivascular infiltrates with numerous neutrophils, scattered eosinophils, and lymphocytes with nuclear dust and focal extravasation of erythrocytes in the dermis (hematoxylin and eosin stain; white arrow, neutrophils and nuclear dust; black arrow, eosinophils; yellow arrowhead, vessels; red arrowhead, erythrocyte extravasation).

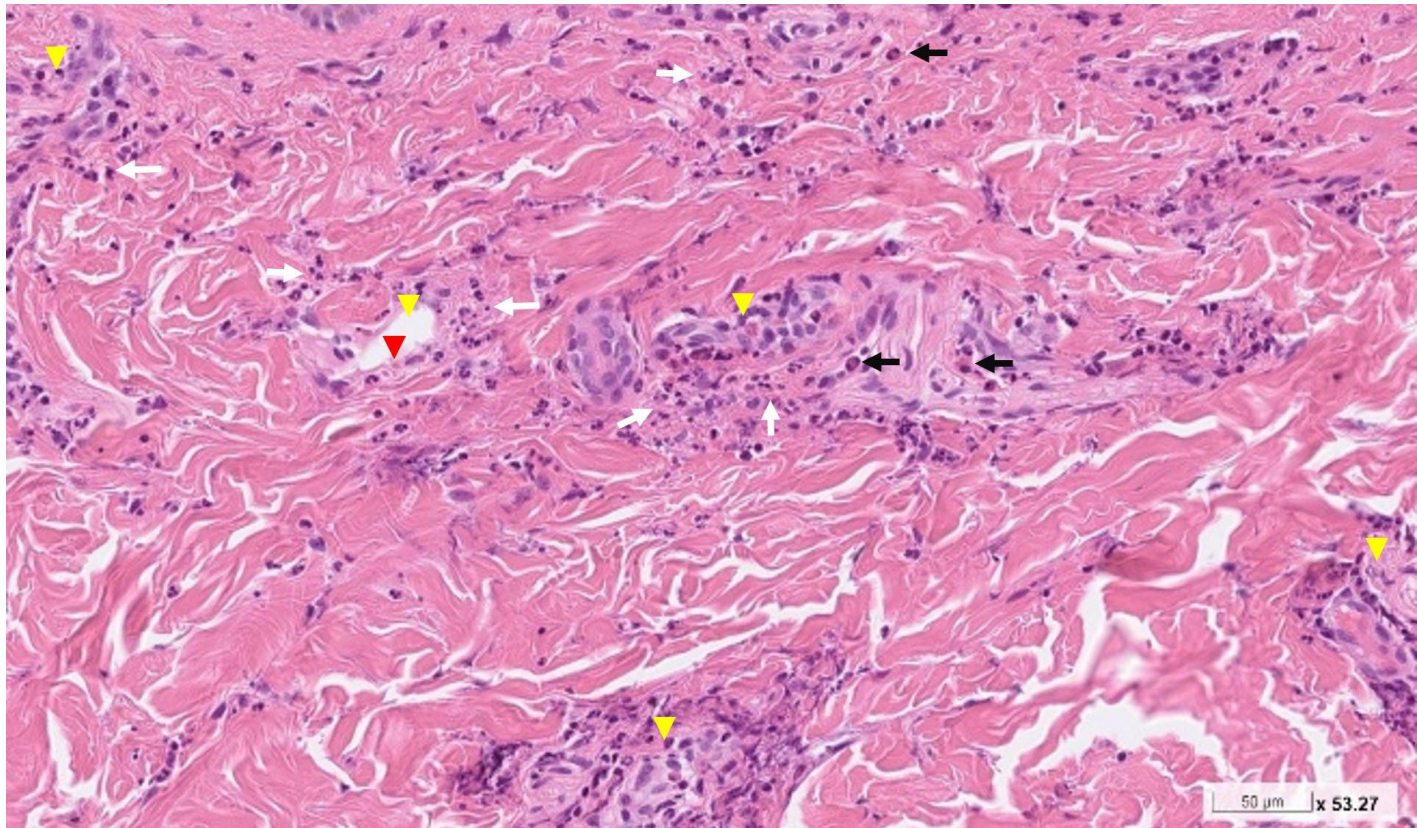

Supplement: 211926-image-1-at.pdf [file 211926-image-1-at.pdf]
